# Supplementary material for: Functionalized nano SiO2 reinforced gelatin–PVA hydrogels for sustainable wood adhesion
Source: Royal Society of Chemistry journal article supplement (doi:10.1039/d6lf00152a), 2026-05-28
Supplement: d6lf00152a1.pdf [file d6lf00152a1.pdf]

Supplementary Information for:

## Functionalized Nano SiO<sub>2</sub> Reinforced Gelatin–PVA Hydrogels for Sustainable Wood Adhesion

Sogand Abbaspoor-Zanjani,<sup>a\*</sup> Carlo Di Bernardo,<sup>a</sup> Jenny Flores Garcia,<sup>a</sup> Mengjiao Wang,<sup>a</sup> Massimo Messori<sup>a</sup>, Camilla Noè<sup>a\*</sup> and Teresa Gatti<sup>a\*</sup>

<sup>a</sup> Department of Applied Science and Technology, Politecnico di Torino, Corso Duca degli Abruzzi 24, 10129 Torino, Italy

### SI1. Roughness measurement

**Table S1.** Confocal roughness parameters (Sa, Sq, Sz) of the plywood substrate measured at three locations (ISO 25178; plane leveling;  $\lambda_s = 5 \mu\text{m}$ ,  $\lambda_c = 50 \mu\text{m}$ ).

| Measurement | Sa ( $\mu\text{m}$ ) | Sq ( $\mu\text{m}$ ) | Sz ( $\mu\text{m}$ ) |
|-------------|----------------------|----------------------|----------------------|
| 1           | 2.25                 | 3.38                 | 137.5                |
| 2           | 2.11                 | 3.46                 | 144.6                |
| 3           | 1.71                 | 3.39                 | 140.8                |

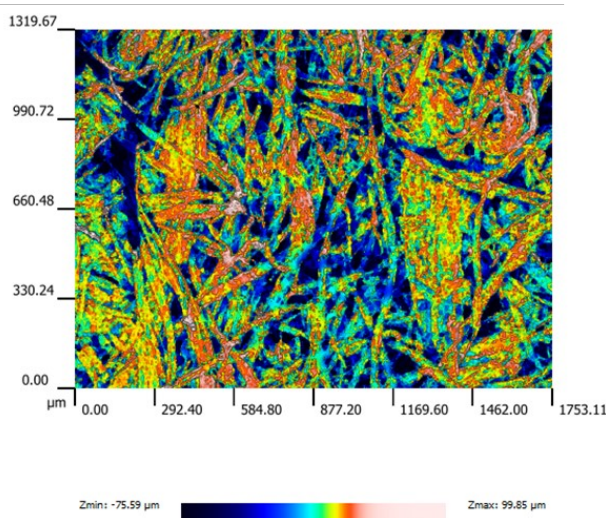

**Fig S1.** Representative confocal 2D surface map of the plywood substrate (same processing conditions).

### SI2. FTIR analysis of nanoparticles

The full FTIR spectra of pristine SiO<sub>2</sub> and SiO<sub>2</sub>–APTES NPs are shown in Fig. S2. Both samples display the characteristic Si–O–Si vibrations of the silica framework around 1000–1250 cm<sup>-1</sup> and ~800 cm<sup>-1</sup>, as well as a broad O–H stretching band at 3200–3700 cm<sup>-1</sup>. In the SiO<sub>2</sub>–APTES spectrum, additional bands

in the 2850–2950  $\text{cm}^{-1}$  and 1550–1650  $\text{cm}^{-1}$  regions corresponding to C–H and N–H vibrations confirm the presence of APTES on the silica surface.

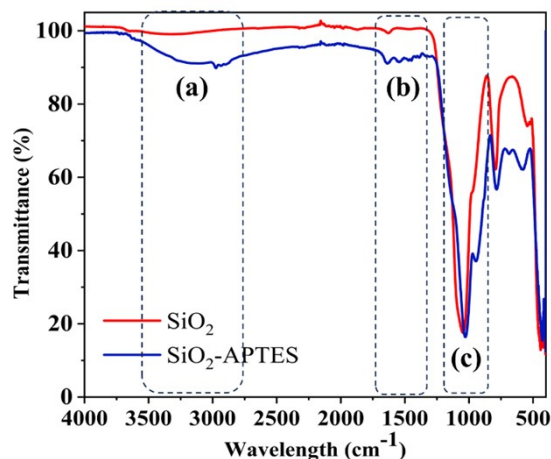

**Fig. S2** Full FTIR spectra of  $\text{SiO}_2$  and  $\text{SiO}_2$ -APTES NPs

### SI3. Thermogravimetric Behavior of APTES functionalized $\text{SiO}_2$

As shown in Fig. S2, both samples exhibited an initial weight loss below 150  $^\circ\text{C}$ , attributed to the desorption of physically adsorbed moisture. However, the  $\text{SiO}_2$ -APTES NPs displayed a higher moisture loss in this region (approximately 10–12%) compared to bare  $\text{SiO}_2$  (about 2–3%), indicating enhanced water adsorption of APTES due to surface functionalization. Beyond 150  $^\circ\text{C}$ , bare  $\text{SiO}_2$  displayed a gradual and minor mass decrease, consistent with the high thermal stability of silica. In contrast,  $\text{SiO}_2$ -APTES exhibited a continuous and more pronounced weight loss up to 800  $^\circ\text{C}$ , which is consistent with the presence of an APTES layer, which enhances water absorption.<sup>1</sup>

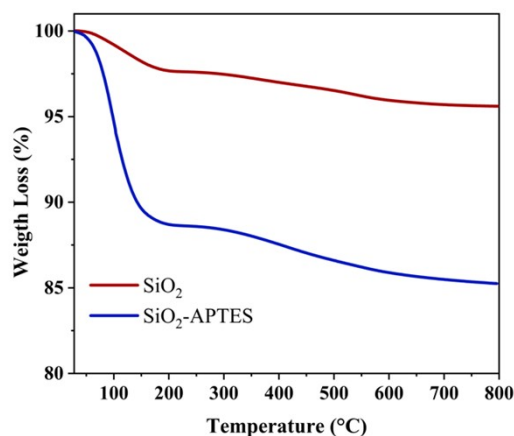

**Fig. S3** TGA of bare  $\text{SiO}_2$  and  $\text{SiO}_2$ -APTES NPs

### SI4. Nitrogen adsorption–desorption (BET) analysis

Nitrogen adsorption–desorption measurements were performed at 77 K to evaluate the textural properties of  $\text{SiO}_2$  and  $\text{SiO}_2$ -APTES. The specific surface area was calculated using the BET method, and pore characteristics were obtained from BJH analysis. The bare  $\text{SiO}_2$  NPs exhibited a BET surface area of 5.01  $\text{m}^2 \text{g}^{-1}$ , which decreased to 3.61  $\text{m}^2 \text{g}^{-1}$  after APTES functionalization, indicating partial coverage of the silica surface by aminopropyl groups grafted onto surface silanol sites.<sup>2</sup> The pore volume also decreased after modification, confirming successful surface grafting. The nitrogen adsorption–desorption isotherms and the corresponding textural parameters are presented in Fig S3.

**Table S2.** BET surface area and pore characteristics of SiO<sub>2</sub> and SiO<sub>2</sub>-APTES NPs derived from nitrogen adsorption-desorption measurements.

| Sample                  | SBET (m <sup>2</sup> g <sup>-1</sup> ) | Vtotal(cm <sup>3</sup> g <sup>-1</sup> ) | Average pore width (nm) |
|-------------------------|----------------------------------------|------------------------------------------|-------------------------|
| SiO <sub>2</sub>        | 5.01                                   | 0.00716                                  | 30.78                   |
| SiO <sub>2</sub> -APTES | 3.61                                   | 0.00299                                  | 11.46                   |

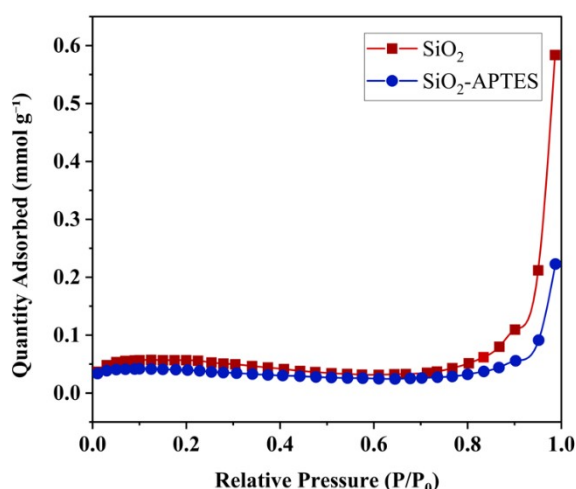

**Fig. S4.** Nitrogen adsorption-desorption isotherms of SiO<sub>2</sub> and SiO<sub>2</sub>-APTES NPs measured at 77 K.

### SI5. Rheological analysis

Fig. S5 displays the  $\Delta G'$  curves for three independent replicates of GP4 and GPS4 (4:1) formulations, confirming the consistency of the destabilization effect at the 4:1 ratio.

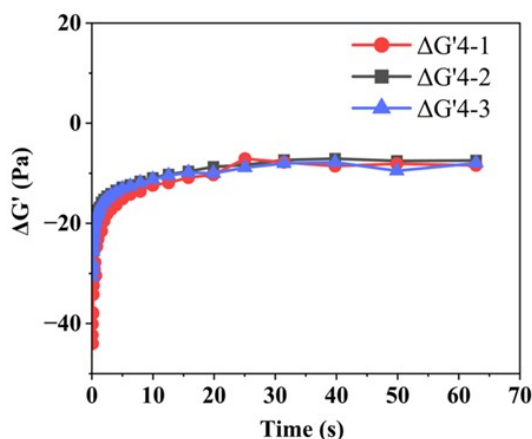

**Fig. S5** Reproducibility study for rheological reinforcement of gelatin/PVA adhesive formulations at at the 4:1 ratio.

The loss modulus ( $G''$ ) as a function of frequency for the gelatin/PVA formulations with and without SiO<sub>2</sub>-APTES NPs is presented in Fig. S4a. In general,  $G''$  increases with increasing frequency for all samples, reflecting the typical viscoelastic response of polymer-based adhesive systems. The incorporation of SiO<sub>2</sub>-APTES NPs slightly modify the viscous response of the system and leads to comparable or moderately higher  $G''$  values in several compositions compared to the corresponding GP formulations. This behavior suggests that the presence of SiO<sub>2</sub>-

APTES NPs contribute to additional molecular interactions within the polymer network, affecting the energy dissipation characteristics of the nanocomposite system, as reported for nanoparticle-reinforced gelatin/PVA composites.<sup>3</sup>

The damping factor ( $\tan \delta = G''/G'$ ) as a function of frequency is shown in Fig. S4b. All samples exhibit  $\tan \delta$  values well below unity across the investigated frequency range, indicating that the elastic component dominates over the viscous response. Moreover, the GPS formulations generally display slightly lower  $\tan \delta$  values compared to the corresponding GP samples, suggesting that the incorporation of SiO<sub>2</sub>-APTES enhances the elastic character of the network. This reduction in  $\tan \delta$  is consistent with stronger polymer–nanoparticle interactions and a more interconnected viscoelastic structure within the composite adhesive system.

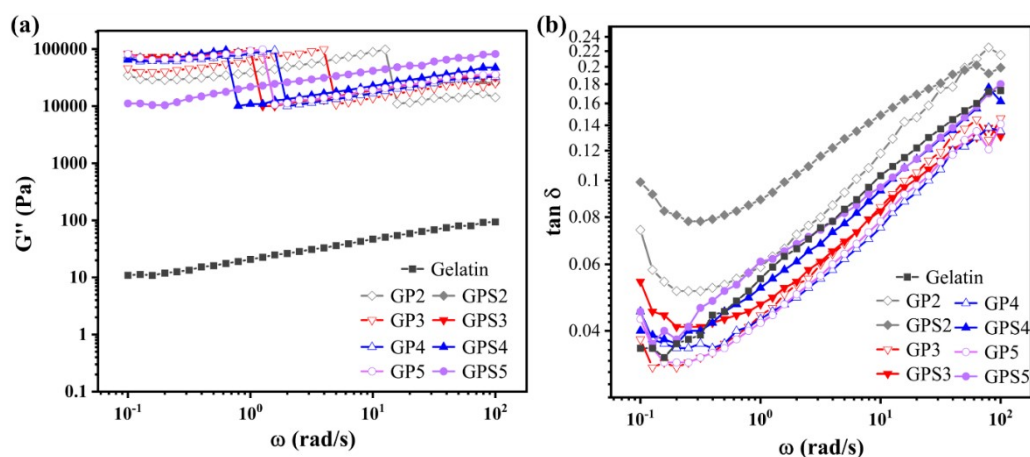

**Fig. S6** (a) Frequency dependence of the loss modulus ( $G''$ ) for gelatin/PVA adhesive formulations with and without SiO<sub>2</sub>-APTES NPs. (b) Damping factor ( $\tan \delta = G''/G'$ ) as a function of angular frequency for the corresponding systems, illustrating the relative contributions of viscous and elastic responses

## SI6. Fractured Surface

The specimens were further separated manually after testing to expose the fracture surfaces. The images show extensive fiber pull-out and the absence of a clean interfacial separation for GPS5, indicating cohesive failure within the wood substrate. This suggests that the adhesive-wood interface is stronger than the cohesive strength of the wood, reflecting effective interfacial bonding, while for GP5 the adhesive was separated, showing weaker adhesive-wood interface.

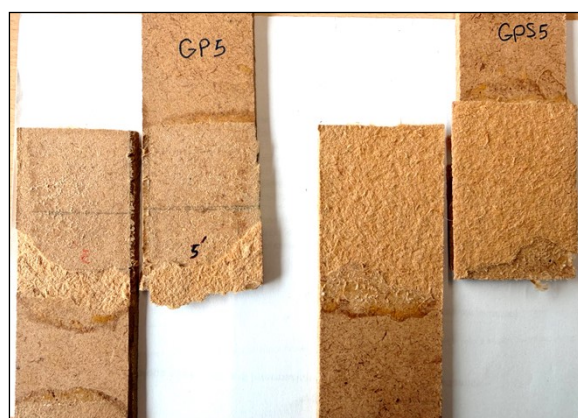

**Fig S7.** Fracture surfaces of plywood specimens after lap-shear testing for GP5 and GPS5 adhesives

### **SI7. Microscopic analysis of adhesives**

Optical microscopy of GPS5 adhesive (Fig. S8) shows a largely homogeneous microstructure, with minor localized heterogeneities observed.

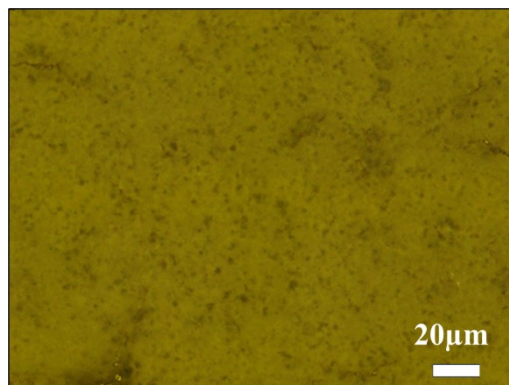

**Fig S8.** Optical microscopy image of GPS5 adhesive-1000x

### **References**

- 1 M. Sándor, C. L. Nistor, G. Szalontai, R. Stoica, C. A. Nicolae, E. Alexandrescu, J. Fazakas, F. Oancea and D. Donescu, Aminopropyl-Silica Hybrid Particles as Supports for Humic Acids Immobilization, *Materials (Basel)*, DOI:10.3390/MA9010034.
- 2 L. T. Zhuravlev, The surface chemistry of amorphous silica. Zhuravlev model, *Colloids Surf. A Physicochem. Eng. Asp.*, 2000, **173**, 1–38.
- 3 T. M. Temel-Soylu, C. Keçeciler-Emir, T. Rababah, C. Özel, S. Yücel, Y. Basaran-Elalmis, D. Altan, Ö. Kirgiz, İ. E. Seçinti, U. Kaya and M. E. Altuğ, Green Electrospun Poly(vinyl alcohol)/Gelatin-Based Nanofibrous Membrane by Incorporating 45S5 Bioglass Nanoparticles and Urea for Wound Dressing Applications: Characterization and In Vitro and In Vivo Evaluations, *ACS Omega*, 2024, **9**, 21187–21203.
